# Supplementary material
Source: Springer Nature journal article supplement (http://www.springermedizin.de/resource/supplementary/13019_2011_504_MOESM2_ESM.pdf/9638510)

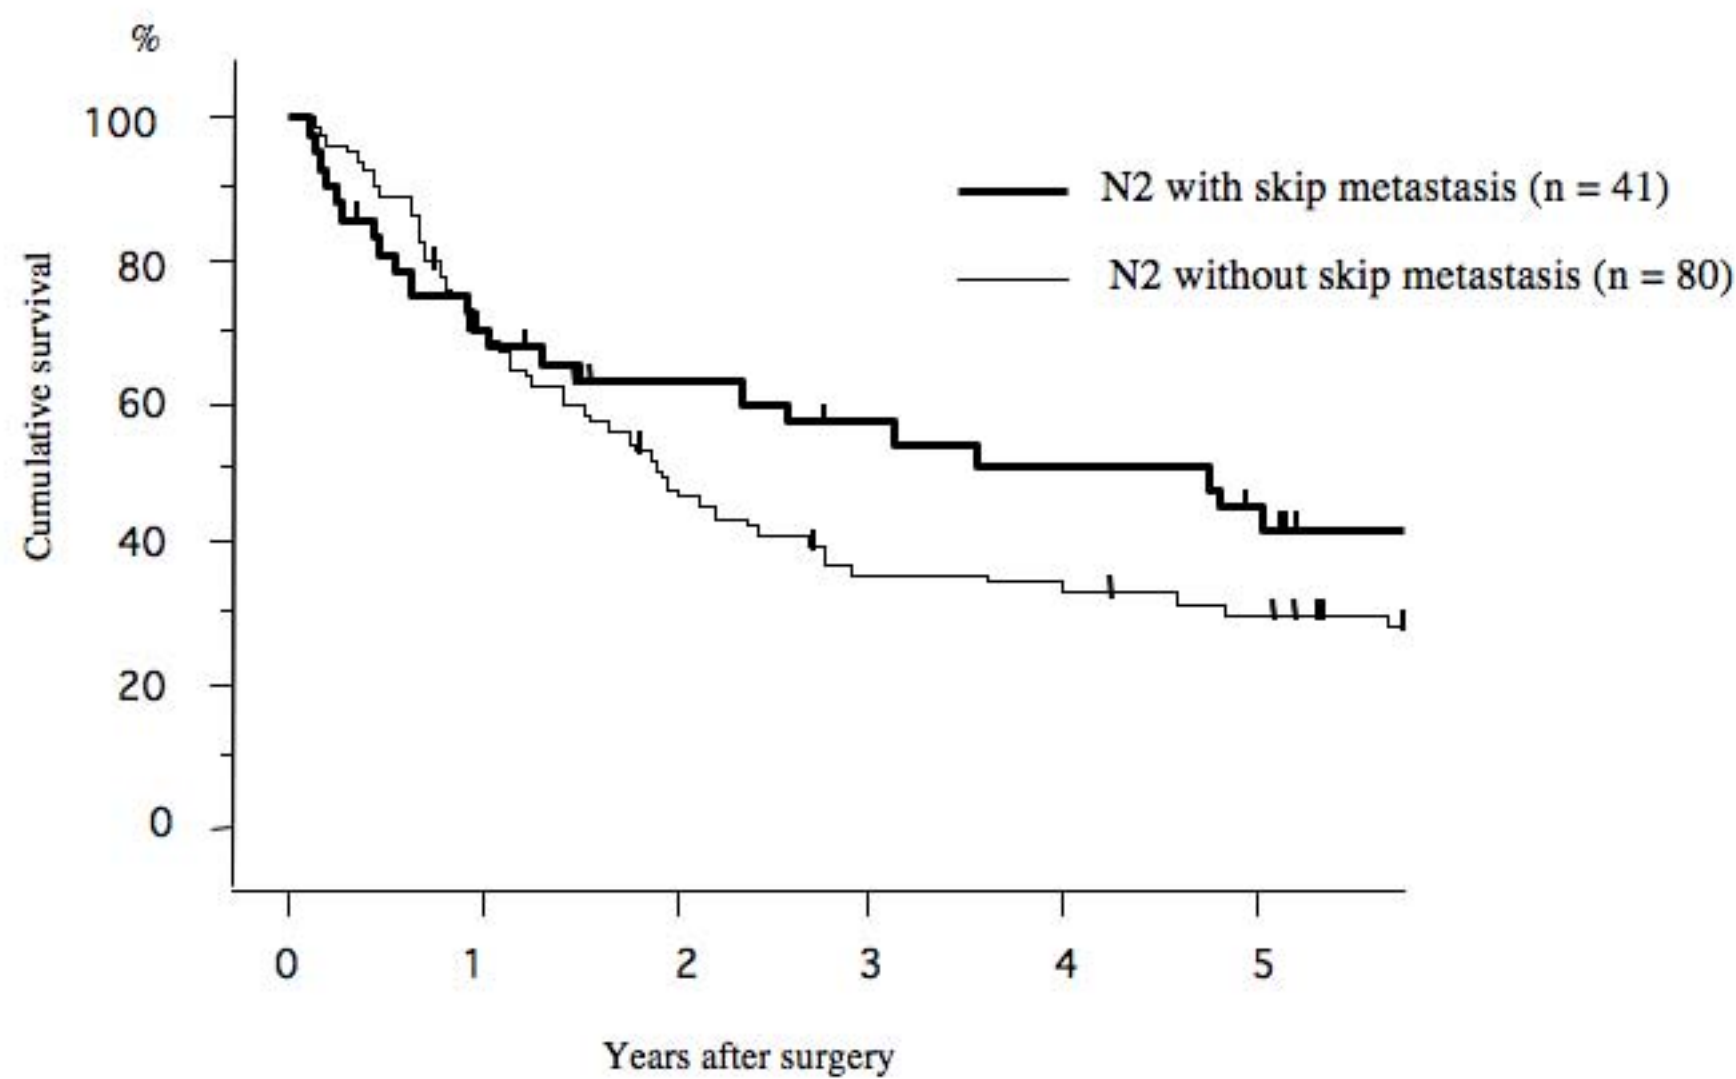

Supplement: MOESM2 [file 9638510]
